# Supplementary material
Source: Springer Nature journal article supplement (https://www.springermedizin.de/resource/supplementary/13019_2011_427_MOESM1_ESM.pdf/9638662)

**(A) Debridement**

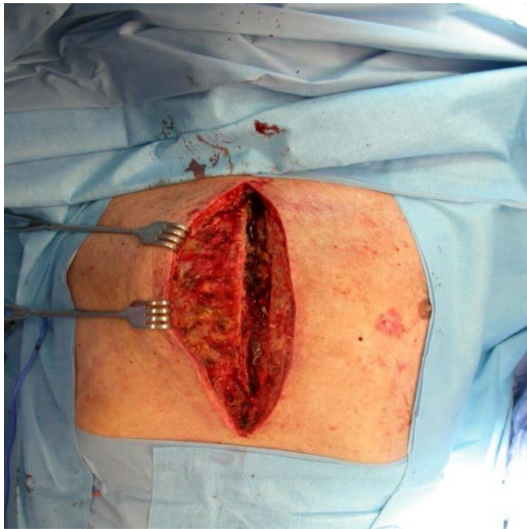

**(B) Sternal Plates fixation**

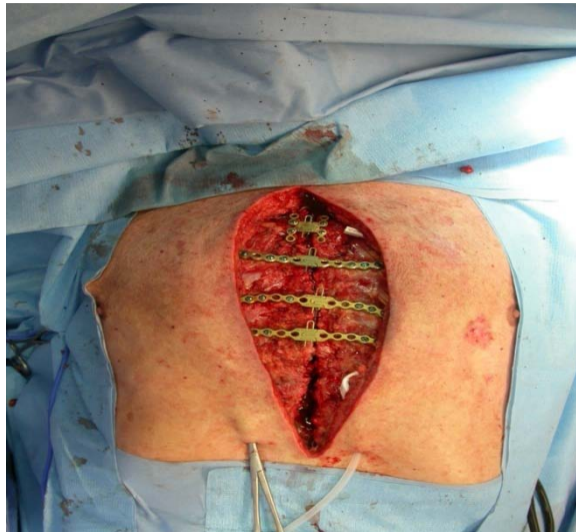

Supplement: MOESM1 [file 9638662]
